# Supplementary material for: Real-World Postmarketing Study of the Impact of Adalimumab Treatment on Work Productivity and Activity Impairment in Patients with Psoriatic Arthritis
Source: Springer Nature journal article supplement (doi:10.1007/s12325-018-0866-y), 2019-01-19
Supplement: MOESM2 [file 16407432]

## Supplementary Material

Fig. S1 Correlation between change in OWI and effectiveness scores at last evaluation: **a** OWI and PASE; **b** OWI and DAS28(CRP); **c** OWI and BASDAI; **d** OWI and HAQ-DI.

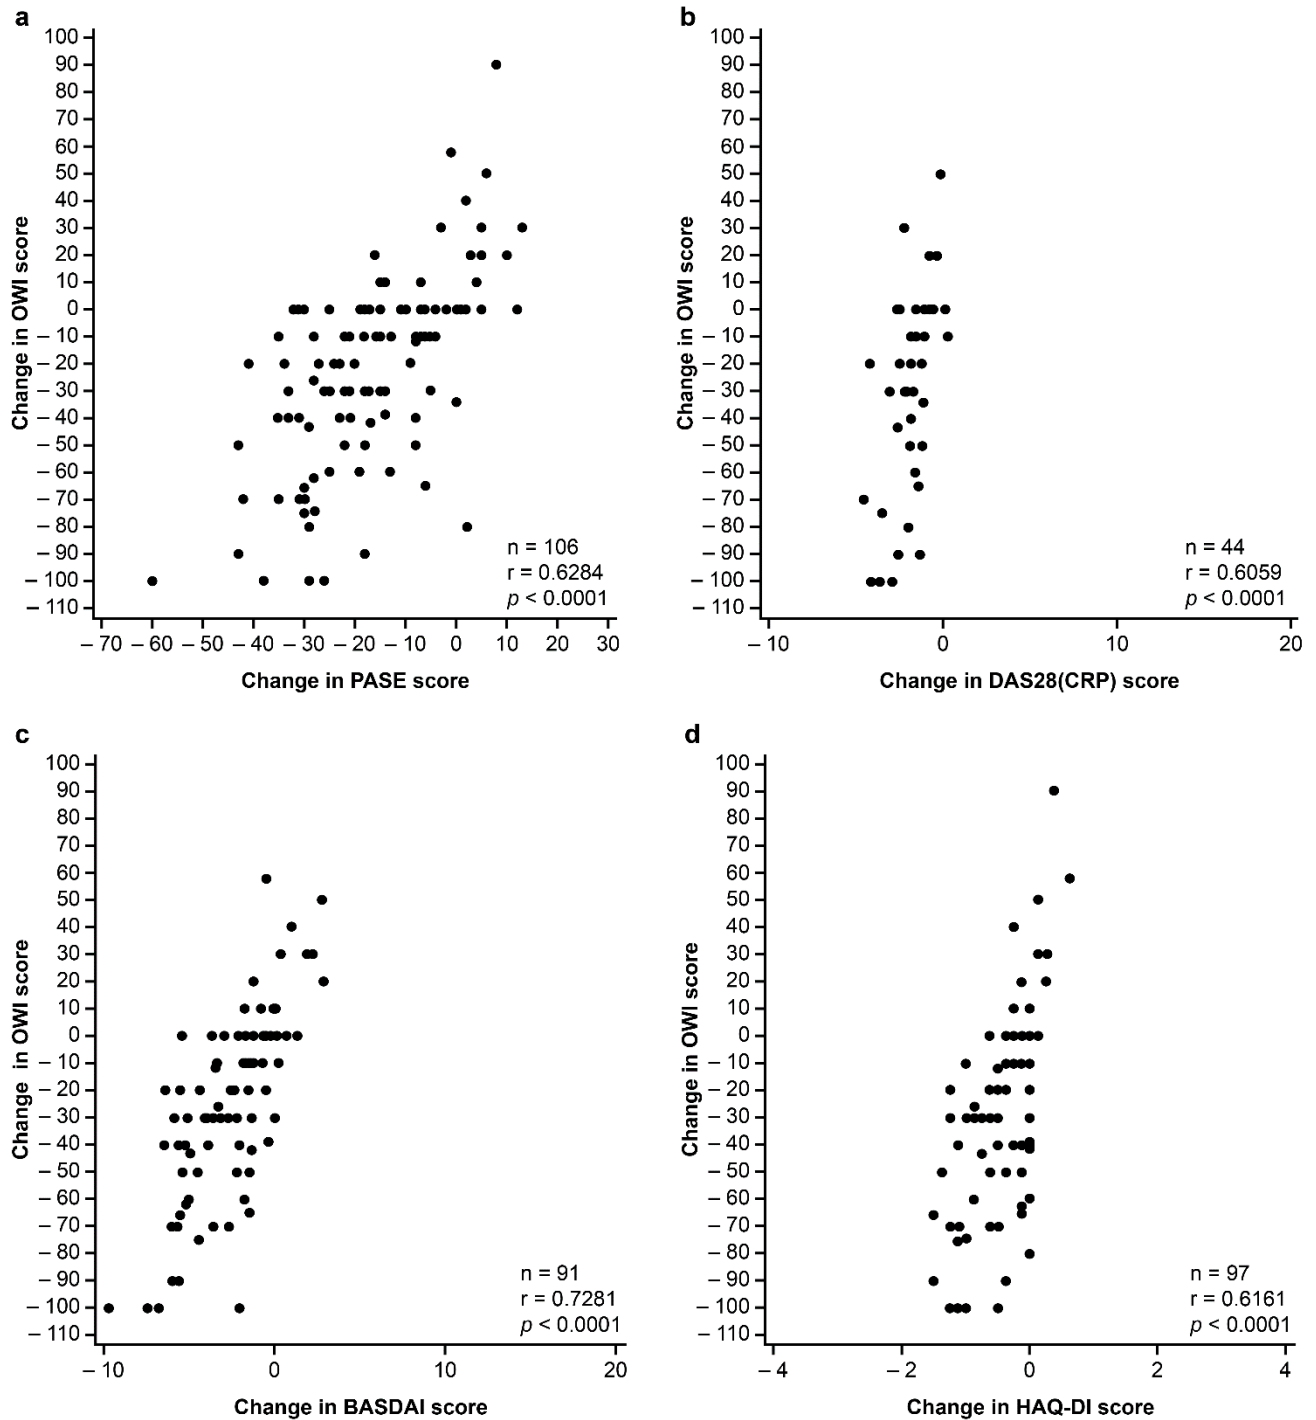

*BASDAI* Bath Ankylosing Spondylitis Disease Activity Index, *CRP* C-reactive protein, *DAS28* Disease Activity Score in 28 joints, *HAQ-DI* Health Assessment Questionnaire-Disability Index, *OWI* overall work impairment, *PASE* Psoriatic Arthritis Screening and Evaluation

**Table S1** Factors affecting OWI score (effectiveness population)

| Baseline factor <sup>a, b</sup>    | <i>n</i> <sup>c</sup> | Baseline      | Last evaluation | Change in score | <i>p</i> value <sup>d</sup> |
|------------------------------------|-----------------------|---------------|-----------------|-----------------|-----------------------------|
| Age (years)                        |                       |               |                 |                 | 0.2966 <sup>e</sup>         |
| ≥15 to <65                         | 99                    | 40.54 ± 33.22 | 17.41 ± 26.03   | - 23.13 ± 36.24 |                             |
| ≥65                                | 7                     | 35.71 ± 28.78 | 27.14 ± 17.99   | - 8.57 ± 19.52  |                             |
| Sex                                |                       |               |                 |                 | 0.1614 <sup>f</sup>         |
| Male                               | 77                    | 41.16 ± 32.86 | 16.02 ± 24.05   | - 25.14 ± 35.02 |                             |
| Female                             | 29                    | 37.73 ± 33.25 | 23.45 ± 29.19   | - 14.28 ± 36.20 |                             |
| Weight (kg)                        |                       |               |                 |                 | 0.1821 <sup>e</sup>         |
| <50                                | 5                     | 51.66 ± 33.24 | 20.00 ± 18.71   | - 31.66 ± 29.53 |                             |
| ≥50 to <60                         | 11                    | 28.72 ± 23.67 | 18.18 ± 27.50   | - 10.54 ± 23.85 |                             |
| ≥60 to <70                         | 26                    | 45.96 ± 32.13 | 15.38 ± 22.84   | - 30.58 ± 27.87 |                             |
| ≥70 to <80                         | 22                    | 45.45 ± 38.39 | 21.26 ± 29.44   | - 24.19 ± 42.63 |                             |
| ≥80 to <90                         | 14                    | 35.88 ± 25.62 | 24.69 ± 31.67   | - 11.19 ± 28.51 |                             |
| ≥90                                | 7                     | 55.71 ± 40.08 | 11.43 ± 22.68   | - 44.29 ± 40.43 |                             |
| Unknown                            | 21                    | 28.68 ± 31.62 | 15.24 ± 23.58   | - 13.44 ± 41.64 |                             |
| BMI (kg/m <sup>2</sup> )           |                       |               |                 |                 | 0.2976 <sup>e</sup>         |
| <25                                | 41                    | 40.79 ± 31.05 | 18.43 ± 26.99   | - 22.36 ± 26.88 |                             |
| ≥25 to <30                         | 30                    | 40.97 ± 32.74 | 18.93 ± 24.78   | - 22.04 ± 37.38 |                             |
| ≥30                                | 8                     | 61.25 ± 40.27 | 20.00 ± 28.78   | - 41.25 ± 39.50 |                             |
| Unknown                            | 27                    | 32.30 ± 32.22 | 15.93 ± 24.85   | - 16.38 ± 43.07 |                             |
| BSA of rash (%)                    |                       |               |                 |                 | 0.8943 <sup>e</sup>         |
| <10                                | 37                    | 39.51 ± 32.87 | 22.43 ± 29.94   | - 17.07 ± 36.07 |                             |
| ≥10 to <20                         | 14                    | 39.64 ± 33.19 | 14.29 ± 24.09   | - 25.36 ± 28.99 |                             |
| ≥20 to <30                         | 9                     | 40.36 ± 31.31 | 22.86 ± 22.56   | - 17.50 ± 27.61 |                             |
| ≥30                                | 12                    | 35.00 ± 32.61 | 16.48 ± 24.48   | - 18.52 ± 39.80 |                             |
| Unknown                            | 34                    | 43.05 ± 34.76 | 14.12 ± 22.58   | - 28.94 ± 38.17 |                             |
| Duration of skin symptoms (years)  |                       |               |                 |                 | 0.1805 <sup>e</sup>         |
| <2                                 | 7                     | 54.21 ± 33.66 | 54.29 ± 37.35   | 0.07 ± 30.72    |                             |
| ≥2 to <5                           | 14                    | 46.19 ± 34.25 | 32.39 ± 32.86   | - 13.80 ± 55.13 |                             |
| ≥5 to <10                          | 16                    | 41.12 ± 24.03 | 10.00 ± 13.17   | - 31.12 ± 19.65 |                             |
| ≥10                                | 54                    | 37.77 ± 32.30 | 15.37 ± 21.69   | - 22.40 ± 29.52 |                             |
| Unknown                            | 15                    | 36.00 ± 42.05 | 6.00 ± 15.49    | - 30.00 ± 45.20 |                             |
| Duration of joint symptoms (years) |                       |               |                 |                 | 0.2537 <sup>e</sup>         |
| <2                                 | 40                    | 44.23 ± 32.24 | 27.84 ± 32.55   | - 16.39 ± 37.06 |                             |
| ≥2 to <5                           | 24                    | 40.64 ± 33.23 | 7.50 ± 11.13    | - 33.14 ± 33.69 |                             |
| ≥5 to <10                          | 15                    | 21.95 ± 26.48 | 6.67 ± 9.00     | - 15.29 ± 26.10 |                             |
| ≥10                                | 15                    | 51.33 ± 29.97 | 30.67 ± 25.76   | - 20.67 ± 34.53 |                             |
| Unknown                            | 12                    | 35.00 ± 39.43 | 5.00 ± 11.68    | - 30.00 ± 43.48 |                             |
| Comorbidities                      |                       |               |                 |                 | 0.3313 <sup>f</sup>         |
| Absent                             | 60                    | 38.12 ± 32.20 | 13.00 ± 19.25   | - 25.12 ± 32.05 |                             |
| Present                            | 46                    | 42.97 ± 33.82 | 24.64 ± 31.13   | - 18.33 ± 39.60 |                             |
| Past medical history               |                       |               |                 |                 | 0.0455 <sup>f</sup>         |
| Absent                             | 85                    | 43.13 ± 33.51 | 17.13 ± 24.92   | - 26.00 ± 34.07 |                             |

|                                                        |     |               |               |                 |                     |
|--------------------------------------------------------|-----|---------------|---------------|-----------------|---------------------|
| Present                                                | 20  | 29.39 ± 28.05 | 20.89 ± 29.13 | - 8.50 ± 37.82  |                     |
| Unknown                                                | 1   | 10.00         | 40.00         | 30.00           |                     |
| Smoking history                                        |     |               |               |                 | 0.9120 <sup>f</sup> |
| Absent                                                 | 42  | 38.45 ± 33.00 | 15.32 ± 22.94 | - 23.13 ± 34.30 |                     |
| Present                                                | 41  | 45.67 ± 33.11 | 21.71 ± 27.83 | - 23.97 ± 34.52 |                     |
| Unknown                                                | 23  | 33.75 ± 31.94 | 16.52 ± 26.56 | - 17.23 ± 40.32 |                     |
| Previous treatment                                     |     |               |               |                 | 0.3265 <sup>f</sup> |
| Absent                                                 | 4   | 27.50 ± 34.03 | 22.50 ± 28.72 | - 5.00 ± 5.77   |                     |
| Present                                                | 102 | 40.72 ± 32.87 | 17.88 ± 25.65 | - 22.85 ± 36.02 |                     |
| Previous biologic                                      |     |               |               |                 | 0.1766 <sup>f</sup> |
| Absent                                                 | 95  | 41.06 ± 32.66 | 17.30 ± 25.18 | - 23.76 ± 34.85 |                     |
| Present                                                | 11  | 32.98 ± 35.12 | 24.55 ± 29.79 | - 8.44 ± 39.85  |                     |
| Previous topical corticosteroid                        |     |               |               |                 | 0.1301 <sup>f</sup> |
| Absent                                                 | 39  | 41.08 ± 33.42 | 12.05 ± 16.73 | - 29.03 ± 33.33 |                     |
| Present                                                | 67  | 39.73 ± 32.75 | 21.54 ± 29.16 | - 18.18 ± 36.37 |                     |
| Previous topical activated vitamin D <sub>3</sub>      |     |               |               |                 | 0.4565 <sup>f</sup> |
| Absent                                                 | 53  | 42.49 ± 34.22 | 17.74 ± 24.78 | - 24.75 ± 37.58 |                     |
| Present                                                | 53  | 37.96 ± 31.56 | 18.37 ± 26.69 | - 19.59 ± 33.47 |                     |
| Previous oral cyclosporin                              |     |               |               |                 | 0.3432 <sup>f</sup> |
| Absent                                                 | 93  | 41.79 ± 33.00 | 18.39 ± 26.14 | - 23.40 ± 35.00 |                     |
| Present                                                | 13  | 29.04 ± 30.54 | 15.65 ± 22.44 | - 13.38 ± 39.32 |                     |
| Previous oral retinoid                                 |     |               |               |                 | 0.9582 <sup>f</sup> |
| Absent                                                 | 99  | 40.54 ± 32.77 | 18.42 ± 26.15 | - 22.12 ± 35.60 |                     |
| Present                                                | 7   | 35.71 ± 36.14 | 12.86 ± 17.04 | - 22.86 ± 36.92 |                     |
| Previous oral MTX                                      |     |               |               |                 | 0.1914 <sup>f</sup> |
| Absent                                                 | 63  | 38.33 ± 33.89 | 19.90 ± 28.79 | - 18.44 ± 36.56 |                     |
| Present                                                | 43  | 42.99 ± 31.43 | 15.35 ± 20.16 | - 27.64 ± 33.57 |                     |
| Previous oral DMARD (excluding MTX)                    |     |               |               |                 | 0.9483 <sup>f</sup> |
| Absent                                                 | 96  | 40.16 ± 33.12 | 18.06 ± 25.80 | - 22.10 ± 35.36 |                     |
| Present                                                | 10  | 40.87 ± 31.68 | 18.00 ± 25.30 | - 22.87 ± 38.91 |                     |
| Previous oral corticosteroid                           |     |               |               |                 | 0.5630 <sup>f</sup> |
| Absent                                                 | 88  | 39.48 ± 31.99 | 16.40 ± 23.28 | - 23.08 ± 35.96 |                     |
| Present                                                | 18  | 43.84 ± 37.54 | 26.11 ± 34.66 | - 17.73 ± 33.81 |                     |
| Previous oral NSAID                                    |     |               |               |                 | 0.0142 <sup>f</sup> |
| Absent                                                 | 59  | 31.08 ± 30.15 | 16.40 ± 25.01 | - 14.67 ± 33.47 |                     |
| Present                                                | 47  | 51.70 ± 32.77 | 20.12 ± 26.52 | - 31.58 ± 36.10 |                     |
| Concomitant drugs                                      |     |               |               |                 | 0.9949 <sup>f</sup> |
| Absent                                                 | 16  | 33.99 ± 34.17 | 11.88 ± 24.28 | - 22.12 ± 38.54 |                     |
| Present                                                | 90  | 41.33 ± 32.67 | 19.15 ± 25.84 | - 22.18 ± 35.17 |                     |
| Concomitant topical corticosteroid                     |     |               |               |                 | 0.9546 <sup>f</sup> |
| Absent                                                 | 76  | 37.21 ± 32.02 | 14.91 ± 22.46 | - 22.30 ± 33.96 |                     |
| Present                                                | 30  | 47.86 ± 34.21 | 26.00 ± 31.36 | - 21.86 ± 39.78 |                     |
| Concomitant topical vitamin D <sub>3</sub> derivatives |     |               |               |                 | 0.8660 <sup>f</sup> |
| Absent                                                 | 79  | 39.09 ± 32.50 | 17.26 ± 25.39 | - 21.83 ± 36.04 |                     |
| Present                                                | 27  | 43.54 ± 34.22 | 20.37 ± 26.67 | - 23.17 ± 34.54 |                     |
| Concomitant oral retinoid                              |     |               |               |                 |                     |

|                                        |     |               |               |                 |                       |
|----------------------------------------|-----|---------------|---------------|-----------------|-----------------------|
| Absent                                 | 104 | 40.80 ± 32.89 | 18.01 ± 25.73 | - 22.79 ± 35.46 | 0.1972 <sup>f</sup>   |
| Present                                | 2   | 10.00 ± 0.00  | 20.00 ± 28.28 | 10.00 ± 28.28   |                       |
| Concomitant oral MTX                   |     |               |               |                 | 0.1615 <sup>f</sup>   |
| Absent                                 | 68  | 37.43 ± 33.33 | 18.88 ± 27.26 | - 18.55 ± 37.44 |                       |
| Present                                | 38  | 45.23 ± 31.77 | 16.58 ± 22.69 | - 28.65 ± 31.19 |                       |
| Concomitant oral DMARD (excluding MTX) |     |               |               |                 | 0.2139 <sup>f</sup>   |
| Absent                                 | 101 | 40.99 ± 33.23 | 17.86 ± 25.97 | - 23.13 ± 35.82 |                       |
| Present                                | 5   | 24.84 ± 19.70 | 22.00 ± 19.24 | - 2.84 ± 23.07  |                       |
| Concomitant oral corticosteroid        |     |               |               |                 | 0.1725 <sup>f</sup>   |
| Absent                                 | 93  | 39.13 ± 32.08 | 15.20 ± 21.93 | - 23.94 ± 37.15 |                       |
| Present                                | 13  | 48.02 ± 38.37 | 38.46 ± 39.34 | - 9.55 ± 16.03  |                       |
| Concomitant oral NSAID                 |     |               |               |                 | 0.2293 <sup>f</sup>   |
| Absent                                 | 78  | 34.14 ± 31.23 | 14.46 ± 21.15 | - 19.68 ± 35.04 |                       |
| Present                                | 28  | 57.18 ± 31.74 | 28.06 ± 33.73 | - 29.12 ± 36.52 |                       |
| PASE                                   |     |               |               |                 | 0.0098 <sup>f</sup>   |
| ≥ 47                                   | 63  | 54.60 ± 29.66 | 25.13 ± 28.12 | - 29.47 ± 36.78 |                       |
| < 47                                   | 43  | 19.16 ± 25.18 | 7.67 ± 17.02  | - 11.49 ± 30.95 |                       |
| DAS28(CRP)                             |     |               |               |                 | 0.0026 <sup>e</sup>   |
| > 5.1                                  | 10  | 75.92 ± 22.67 | 24.00 ± 30.98 | - 51.92 ± 32.89 |                       |
| > 3.2 to ≤ 5.1                         | 32  | 50.49 ± 29.42 | 17.99 ± 20.41 | - 32.50 ± 35.39 |                       |
| > 2.6 to ≤ 3.2                         | 8   | 15.00 ± 14.14 | 16.25 ± 27.74 | 1.25 ± 26.42    |                       |
| ≤ 2.6                                  | 11  | 15.45 ± 29.79 | 8.18 ± 12.50  | - 7.27 ± 31.33  |                       |
| Unknown/missing                        | 45  | 35.53 ± 31.11 | 19.51 ± 29.75 | - 16.02 ± 33.14 |                       |
| HAQ-DI                                 |     |               |               |                 | 0.0004 <sup>e</sup>   |
| > 1.5                                  | 4   | 86.43 ± 9.44  | 27.50 ± 17.08 | - 58.93 ± 25.35 |                       |
| > 1.0 to ≤ 1.5                         | 12  | 75.42 ± 21.47 | 28.33 ± 32.15 | - 47.08 ± 35.06 |                       |
| > 0.5 to ≤ 1.0                         | 29  | 53.21 ± 31.09 | 23.45 ± 28.19 | - 29.76 ± 36.93 |                       |
| ≤ 0.5                                  | 60  | 24.33 ± 24.87 | 13.06 ± 22.62 | - 11.28 ± 31.07 |                       |
| Unknown/missing                        | 1   | 10.00         | 0.00          | - 10.00         |                       |
| BASDAI                                 |     |               |               |                 | < 0.0001 <sup>f</sup> |
| ≥ 4                                    | 48  | 61.86 ± 28.05 | 25.70 ± 30.19 | - 36.16 ± 37.70 |                       |
| < 4                                    | 51  | 19.42 ± 21.76 | 10.78 ± 16.83 | - 8.63 ± 22.73  |                       |
| Unknown/missing                        | 7   | 43.47 ± 36.50 | 18.57 ± 32.88 | - 24.90 ± 59.13 |                       |
| PASI                                   |     |               |               |                 | 0.8605 <sup>e</sup>   |
| < 10                                   | 57  | 46.02 ± 36.18 | 21.85 ± 29.81 | - 24.17 ± 39.96 |                       |
| ≥ 10 to < 20                           | 30  | 34.39 ± 25.33 | 14.59 ± 20.73 | - 19.80 ± 30.55 |                       |
| ≥ 20                                   | 11  | 32.60 ± 34.40 | 8.18 ± 12.50  | - 24.42 ± 34.16 |                       |
| Unknown/missing                        | 8   | 31.25 ± 27.48 | 17.50 ± 20.53 | - 13.75 ± 21.34 |                       |
| Enthesitis                             |     |               |               |                 | 0.4859 <sup>f</sup>   |
| Absent                                 | 62  | 38.69 ± 32.28 | 14.61 ± 22.67 | - 24.08 ± 30.93 |                       |
| Present                                | 39  | 40.75 ± 34.56 | 21.74 ± 28.43 | - 19.01 ± 41.70 |                       |
| Missing                                | 5   | 55.14 ± 27.58 | 32.00 ± 34.21 | - 23.14 ± 42.83 |                       |
| Dactylitis                             |     |               |               |                 | 0.0748 <sup>f</sup>   |
| Absent                                 | 42  | 35.60 ± 29.97 | 20.90 ± 27.46 | - 14.70 ± 34.13 |                       |
| Present                                | 59  | 42.25 ± 35.02 | 14.84 ± 23.30 | - 27.41 ± 35.56 |                       |
| Missing                                | 5   | 55.14 ± 27.58 | 32.00 ± 34.21 | - 23.14 ± 42.83 |                       |

|                |    |               |               |                 |  |                     |
|----------------|----|---------------|---------------|-----------------|--|---------------------|
| Spondylitis    |    |               |               |                 |  | 0.2628 <sup>f</sup> |
| Absent         | 70 | 39.84 ± 34.36 | 15.08 ± 24.72 | - 24.76 ± 36.29 |  |                     |
| Present        | 31 | 38.69 ± 30.30 | 22.51 ± 25.78 | - 16.18 ± 32.95 |  |                     |
| Missing        | 5  | 55.14 ± 27.58 | 32.00 ± 34.21 | - 23.14 ± 42.83 |  |                     |
| Nail psoriasis |    |               |               |                 |  | 0.8157 <sup>f</sup> |
| Absent         | 44 | 40.44 ± 32.98 | 18.54 ± 26.83 | - 21.90 ± 35.40 |  |                     |
| Present        | 54 | 41.38 ± 33.78 | 17.74 ± 25.72 | - 23.64 ± 37.52 |  |                     |
| Missing        | 8  | 31.25 ± 27.48 | 17.50 ± 20.53 | - 13.75 ± 21.34 |  |                     |

*BASDAI* Bath Ankylosing Spondylitis Disease Activity Index, *BMI* body mass index,

*BSA* body surface area, *CRP* C-reactive protein, *DAS28* Disease Activity Score in 28

joints, *DMARD* disease-modifying antirheumatic drug, *HAQ-DI* Health Assessment

Questionnaire-Disability Index, *MTX* methotrexate, *NSAID* nonsteroidal anti-

inflammatory drug, *OWI* overall work impairment, *PASE* Psoriatic Arthritis Screening

and Evaluation, *PASI* Psoriasis Area and Severity Index, *SD* standard deviation

<sup>a</sup>All values are mean ± SD.

<sup>b</sup>Patients with values missing before treatment initiation (between 28 days prior to and the first administration day of adalimumab) were classified as “unknown/missing.”

<sup>c</sup>Patients with missing values were excluded from these analyses.

<sup>d</sup>The significant test was performed on the score before administration and the amount of change at final evaluation.

<sup>e</sup>*p* values were assessed using a one-way analysis of variance.

<sup>f</sup>*p* values were assessed using the *t* test.

**Table S2** Median [range]) effectiveness scores at baseline and 24 weeks

| Effectiveness scores      | <i>n</i> | Baseline         | <i>n</i> | 24 weeks      |
|---------------------------|----------|------------------|----------|---------------|
| WPAI                      |          |                  |          |               |
| OWI, %                    | 106      | 35 (0–100)       | 79       | 10 (0–100)    |
| Absenteeism, %            | 106      | 0 (0–100)        | 79       | 0 (0–100)     |
| Presenteeism, %           | 106      | 30 (0–100)       | 82       | 10 (0–100)    |
| AI, %                     | 104      | 35 (0–100)       | 83       | 10 (0–80)     |
| Skin symptoms, PASI       | 98       | 5.5 (0–39.6)     | 81       | 0.6 (0–13.5)  |
| Joint symptoms            |          |                  |          |               |
| TJC                       | 99       | 5 (0–55)         | 78       | 0 (0–14)      |
| SJC                       | 99       | 3 (0–36)         | 78       | 0 (0–8)       |
| DAS28(ESR)                | 48       | 4.4 (0.3–7.5)    | 24       | 1.7 (0–3.7)   |
| DAS28(CRP)                | 61       | 3.5 (1.3–7.4)    | 29       | 1.9 (1.0–3.1) |
| BASDAI                    | 99       | 3.92 (0.29–9.79) | 68       | 0.97 (0–7.08) |
| PASE                      | 106      | 48 (17–75)       | 83       | 28 (15–59)    |
| Patient-reported outcomes |          |                  |          |               |
| HAQ-DI                    | 105      | 0.5 (0–2.1)      | 67       | 0 (0–1)       |
| PGA                       | 105      | 62 (1–100)       | 81       | 10 (0–85)     |
| VAS                       | 105      | 59 (1–100)       | 81       | 8 (0–84)      |
| PhGA VAS                  | 99       | 42 (0–100)       | 76       | 6 (0–90)      |

*AI* activity impairment, *BASDAI* Bath Ankylosing Spondylitis Disease Activity Index, *CRP* C-reactive protein, *DAS28* Disease Activity Score in 28 joints, *ESR* erythrocyte sedimentation rate, *HAQ-DI* Health Assessment Questionnaire-Disability Index, *OWI* overall work impairment,

*PASE* Psoriatic Arthritis Screening and Evaluation, *PASI* Psoriasis Area and Severity Index,  
*PGA* patient global assessment, *PhGA* physician global assessment, *SJC* swollen joint count,  
*TJC* tender joint count, *VAS* visual analog scale, *WPAI* Work Productivity and Activity  
Impairment
